# Supplementary material
Source: PubMed Central journal article supplement (PMC3563411)
Supplement: 97320630009018S1.pdf [file 97320630009018S1.pdf]

## Supplementary material:

**Table 1:** Cultural characteristics of actinomycete strain D25

| Medium                                         | Growth   | Colony consistency | Aerial mass colour | Reverse side pigment | Soluble pigment |
|------------------------------------------------|----------|--------------------|--------------------|----------------------|-----------------|
| Tryptone yeast extract agar (ISP1 medium)      | Moderate | Powdery            | Gray               | -                    | -               |
| Yeast extract malt extract agar (ISP 2 medium) | Good     | Powdery            | Ash                | Yellow               | Yellow          |
| Oat Meal agar (ISP 3 medium)                   | Moderate | Powdery            | White Gray         | Yellow               | Yellow          |
| Inorganic salts - starch agar (ISP4 medium)    | Good     | Powdery            | Ash                | -                    | -               |
| Glycerol asparagine agar (ISP 5 medium)        | Moderate | Powdery            | White              | -                    | -               |
| Peptone yeast extract iron agar (ISP6 medium)  | Good     | Powdery            | White              | Yellow               | Yellow          |
| Tyrosine agar (ISP 7 medium)                   | Good     | Powdery            | White Gray         | -                    | -               |

Pigment absent
